# Supplementary material
Source: PubMed Central journal article supplement (PMC11028054)
Supplement: 262_2017_2073_MOESM1_ESM.pdf [file 262_2017_2073_MOESM1_ESM.pdf]

| Inclusion                                                                                                              | Exclusion                                                                                                                                                                                                                                                                                                                                                                                       |
|------------------------------------------------------------------------------------------------------------------------|-------------------------------------------------------------------------------------------------------------------------------------------------------------------------------------------------------------------------------------------------------------------------------------------------------------------------------------------------------------------------------------------------|
| Diagnosis of Metastatic Melanoma (clinically or radiographically)                                                      | Special classes of patients: fetuses, pregnant women, prisoners, children, institutionalized individuals and other vulnerable individuals                                                                                                                                                                                                                                                       |
| 18 years or older                                                                                                      | Patients taking steroids                                                                                                                                                                                                                                                                                                                                                                        |
| Able to consent and consented                                                                                          | Nursing and pregnant patients                                                                                                                                                                                                                                                                                                                                                                   |
| BRAF mutation status at position 600 known, and if V600E present, have refused or failed treatment with BRAF inhibitor | Patients with prior malignancies except if in situ cervical cancer, adequately treated basal cell or squamous cell cancer, adequately treated Stage I or II cancer from which the patient is in complete remission or any other cancer from which the patient has been disease free for at least five years                                                                                     |
| If received anti-CTLA-4 therapy, must wait at least 3 months from last dose prior to enrollment                        | Patients with a history of metastatic melanoma involving the brain if they had active disease within the prior six months that was not controlled with surgery or radiotherapy                                                                                                                                                                                                                  |
| Melanoma must be positive for tyrosinase and HLA-A2 per pathologic review (Supplemental Figure 1)                      | Patients that have undergone prior immunotherapy combined with non-myeloablative chemotherapy                                                                                                                                                                                                                                                                                                   |
|                                                                                                                        | Patients that have undergone prior immunotherapy targeting tyrosinase                                                                                                                                                                                                                                                                                                                           |
|                                                                                                                        | Patients with abnormal left ventricular function measured by screening echocardiogram                                                                                                                                                                                                                                                                                                           |
|                                                                                                                        | Patients with active HIV, HBV, HCV, or HSV infections                                                                                                                                                                                                                                                                                                                                           |
|                                                                                                                        | Patients with performance status of $\geq 2$ , absolute neutrophil counts $<1500/\mu\text{L}$ , platelet counts $< 100,000/\mu\text{L}$ , bilirubin $> 1.5x$ the upper limit of normal, ALT <sup>a</sup> or AST <sup>b</sup> values $> 2.5x$ upper limit of normal, albumin $<2.5\text{g/dL}$ , INR <sup>c</sup> $> 1.5$ , or creatinine clearance (Cockcroft and Gault) $< 50\text{mL/minute}$ |

**Supplementary Table 1: Inclusion/Exclusion Criteria**

<sup>a</sup>ALT: Alanine Aminotransferase

<sup>b</sup>AST: Aspartate Aminotransferase

<sup>c</sup>INR: International Normalized Ratio

| Day                                                        |                                                                                                                         | Patient 1                                        | Patient 2                                        | Patient 3                                        |
|------------------------------------------------------------|-------------------------------------------------------------------------------------------------------------------------|--------------------------------------------------|--------------------------------------------------|--------------------------------------------------|
| <b>Transduction and Initial Phenotype</b>                  |                                                                                                                         |                                                  |                                                  |                                                  |
| 0                                                          | Number of PBMCs collected in apheresis                                                                                  | 1.62 x 10 <sup>10</sup>                          | 1.00 x 10 <sup>10</sup>                          | 7.23 x 10 <sup>9</sup>                           |
| 0                                                          | Number of PBMCs stimulated                                                                                              | 6.00 x 10 <sup>8</sup>                           | 6.00 x 10 <sup>8</sup>                           | 6.00 x 10 <sup>8</sup>                           |
| 2                                                          | Number of PBMCs post-stimulation                                                                                        | 2.33 x 10 <sup>8</sup>                           | 5.95 x 10 <sup>8</sup>                           | 1.10 x 10 <sup>9</sup>                           |
| 2                                                          | Number of PBMCs transduced                                                                                              | 1.92 x 10 <sup>8</sup>                           | 1.92 x 10 <sup>8</sup>                           | 1.92 x 10 <sup>8</sup>                           |
| 3                                                          | Number of PBMCs after transduction                                                                                      | 2.93 x 10 <sup>8</sup>                           | 2.54 x 10 <sup>8</sup>                           | 1.25 x 10 <sup>8</sup>                           |
| <b>Enrichment of transduced (CD34<sup>+</sup>) T cells</b> |                                                                                                                         |                                                  |                                                  |                                                  |
| 6                                                          | Percent CD34 <sup>+</sup> of CD3 <sup>+</sup> post-enrichment (percent pre-enrichment)                                  | 94.9 (28)                                        | 98.6 (30.8)                                      | 97.3 (16.3)                                      |
| 6                                                          | Percent CD34 <sup>+</sup> CD8 <sup>+</sup> of CD3 <sup>+</sup> post-enrichment (percent pre-enrichment)                 | 35.5 (8.5)                                       | 22.2 (10.0)                                      | 30.7 (7.4)                                       |
| 6                                                          | Percent CD34 <sup>+</sup> CD4 <sup>+</sup> of CD3 <sup>+</sup> post-enrichment (percent pre-enrichment)                 | 61.5 (16.5)                                      | 77.1 (18.9)                                      | 67.0 (11.9)                                      |
| 6                                                          | Percent CD34 <sup>+</sup> vβ12 <sup>+</sup> CD8 <sup>+</sup> of CD3 <sup>+</sup> post-selection (percent pre-selection) | 13.7 (2.7)                                       | 9.5 (1.4)                                        | 9.8 (0.7)                                        |
| 6                                                          | Percent CD34 <sup>+</sup> vβ12 <sup>+</sup> CD4 <sup>+</sup> of CD3 <sup>+</sup> post-selection (percent pre-selection) | 33.4 (7.5)                                       | 47.0 (5.5)                                       | 30.4 (2.2)                                       |
| 6                                                          | Number of cells enriched for CD34 (number pre-enrichment)                                                               | 2.21 x 10 <sup>8</sup> (1.23 x 10 <sup>9</sup> ) | 3.00 x 10 <sup>7</sup> (6.25 x 10 <sup>8</sup> ) | 8.10 x 10 <sup>6</sup> (1.78 x 10 <sup>8</sup> ) |
| 6 <sup>a</sup>                                             | Copy number of cells enriched for CD34 expression                                                                       | 3.3                                              | 2.3                                              | 2.6                                              |
| <b>Cell Growth</b>                                         |                                                                                                                         |                                                  |                                                  |                                                  |
|                                                            | Doubling time for cells cultured day 3 to 6 (days/division)                                                             | 1.45                                             | 2.31                                             | 5.90                                             |
| 10                                                         | Cell number expanded in Rapid Expansion Protocol (REP)                                                                  | 4.00 x 10 <sup>6</sup>                           | 6.00 x 10 <sup>6</sup>                           | 4.00 x 10 <sup>6</sup>                           |
| 15                                                         | REP day 5 cell number                                                                                                   | 5.60 x 10 <sup>8</sup>                           | 4.75 x 10 <sup>8</sup>                           | 2.8 x 10 <sup>8</sup>                            |
| 18                                                         | REP day 8 cell number                                                                                                   | 4.00 x 10 <sup>9</sup>                           | 1.90 x 10 <sup>9</sup>                           | 1.90 x 10 <sup>9</sup>                           |
| 20                                                         | REP day 10 cell number                                                                                                  | 4.00 x 10 <sup>9</sup>                           | 7.46 x 10 <sup>9</sup>                           | 5.80 x 10 <sup>9</sup>                           |
|                                                            | Doubling time for cells in REP (days/division)                                                                          | 1.06                                             | 1.5                                              | 1.09                                             |
| <b>Final Product Phenotype and Function</b>                |                                                                                                                         |                                                  |                                                  |                                                  |
| 18 <sup>b</sup>                                            | IFNγ: T2+Tyrosinase (T2 alone) [pg/mL]                                                                                  | 879 (32)                                         | 1492 (449)                                       | 2738 (176)                                       |
| 18 <sup>b</sup>                                            | IFNγ: 624-Mel (A2-negative 624-28) [pg/mL]                                                                              | 356 (10)                                         | 494 (18)                                         | 908 (77)                                         |
| 20 <sup>c</sup>                                            | Final Cell Number                                                                                                       | 7.43 x 10 <sup>9</sup>                           | 7.06 x 10 <sup>9</sup>                           | 5.38 x 10 <sup>9</sup>                           |
| 20 <sup>c</sup>                                            | Final Product Percent CD34 <sup>+</sup> of CD3 <sup>+</sup>                                                             | 88.1                                             | 95.80                                            | 92.90                                            |
| 20 <sup>c</sup>                                            | Final Product Percent vβ12 <sup>+</sup> of CD34 <sup>+</sup>                                                            | 27.7                                             | 46.5                                             | 43.7                                             |
| 20 <sup>c</sup>                                            | Final Product Percent CD8 <sup>+</sup> CD34 <sup>+</sup> of CD3 <sup>+</sup>                                            | 50.5                                             | 44.4                                             | 36.8                                             |
| 20 <sup>c</sup>                                            | Final Product Percent CD4 <sup>+</sup> CD34 <sup>+</sup> of CD3 <sup>+</sup>                                            | 40.1                                             | 51.4                                             | 57.3                                             |
| 20 <sup>c</sup>                                            | Transduced Cell Number Infused into Patient (Total Cells Infused into Patient)                                          | 2.00 x 10 <sup>8</sup> (2.27x 10 <sup>8</sup> )  | 2.72 x 10 <sup>8</sup> (2.87x 10 <sup>8</sup> )  | 2.06 x 10 <sup>8</sup> (2.22x 10 <sup>8</sup> )  |
| 20 <sup>c</sup>                                            | Cell Dose per kilogram patient weight                                                                                   | 1.67 x 10 <sup>6</sup>                           | 2.5 x 10 <sup>6</sup>                            | 2.5 x 10 <sup>6</sup>                            |
| 13 <sup>d</sup>                                            | Final viral copy number                                                                                                 | 7.5                                              | 2.4                                              | 2.1                                              |

### Supplementary Table 2: Patient T cell Product Generation

<sup>a</sup> Day 12 was day of copy number testing for patient 1. After Patient 1 had a copy number higher than protocol allowed for, an earlier copy number test was implemented

<sup>b</sup> Day 21 for Patient 1.

<sup>c</sup> Day 24 for Patient 1. Due to the high copy number in Patient 1, delivery of final product was delayed (within the acceptable window as laid out by the protocol).

<sup>d</sup> REP day 13 for Patient 1, day 10 pre-REP for Patients 2, 3

|           | Day       | Symptoms & Responses                                                                                                                                                                                                                                                                                                                                      |
|-----------|-----------|-----------------------------------------------------------------------------------------------------------------------------------------------------------------------------------------------------------------------------------------------------------------------------------------------------------------------------------------------------------|
| Patient 1 | -3        | Found pulmonary emboli incidentally on imaging and started on anticoagulation.                                                                                                                                                                                                                                                                            |
|           | 0         | Developed melena with a subsequent hemoglobin decrease from 9.7 to 7.7 g/dL. An emergent upper endoscopy was performed, which demonstrated two large gastric ulcers with irregular borders concerning for metastatic disease. Anticoagulation was discontinued and the patient's symptoms resolved.                                                       |
|           | 1         | Developed neutropenia                                                                                                                                                                                                                                                                                                                                     |
|           | 3         | Developed grade 4 lymphopenia, resolved after outpatient followup                                                                                                                                                                                                                                                                                         |
|           | 4         | Neutropenia progressed to grade 4, recovered by discharge from hospital to 500 cells/microliter                                                                                                                                                                                                                                                           |
|           | 7         | Grade 4 thrombocytopenia, developed fevers—central line-associated bacteremia. Resolved after full course of antibiotics and removal of the line.                                                                                                                                                                                                         |
|           | Patient 2 | 3                                                                                                                                                                                                                                                                                                                                                         |
| 4         |           | Developed grade 4 lymphopenia, resolved by time of outpatient follow-up. Neutropenia progressed to grade 4, resolved by time of discharge to over 500 cells per microliter<br>Developed a maculopapular rash on his lower extremities along with erythematous area on his chest, symptoms were well controlled with diphenhydramine and topical ointments |
| 5         |           | Developed fevers, given febrile neutropenia treatment, including fluconazole and meropenem                                                                                                                                                                                                                                                                |
| 6         |           | Experienced a witnessed tonic-clonic seizure, despite therapeutic levels of usual anti-epileptic medication. No further seizure episodes after discontinuing fluconazole and meropenem used to treat febrile neutropenia                                                                                                                                  |
| 7         |           | Developed grade 3 thrombocytopenia, resolved by time of outpatient appointment<br>No evidence of infections was found during the hospital course.                                                                                                                                                                                                         |
| Patient 3 |           | 3                                                                                                                                                                                                                                                                                                                                                         |
|           | 4         | Developed grade 4 neutropenia and fevers<br>Developed developed pink rash on abdomen that later spread to thighs bilaterally. Noted to have erythematous areas on face, chest, and back                                                                                                                                                                   |
|           | 6         | Developed grade 4 thrombocytopenia, resolved by time of outpatient follow-up                                                                                                                                                                                                                                                                              |
|           | 10        | Neutrophil count recovered to above 500 cell/microliter and fevers resolved.                                                                                                                                                                                                                                                                              |

**Supplementary Table 3: Patient Toxicities**

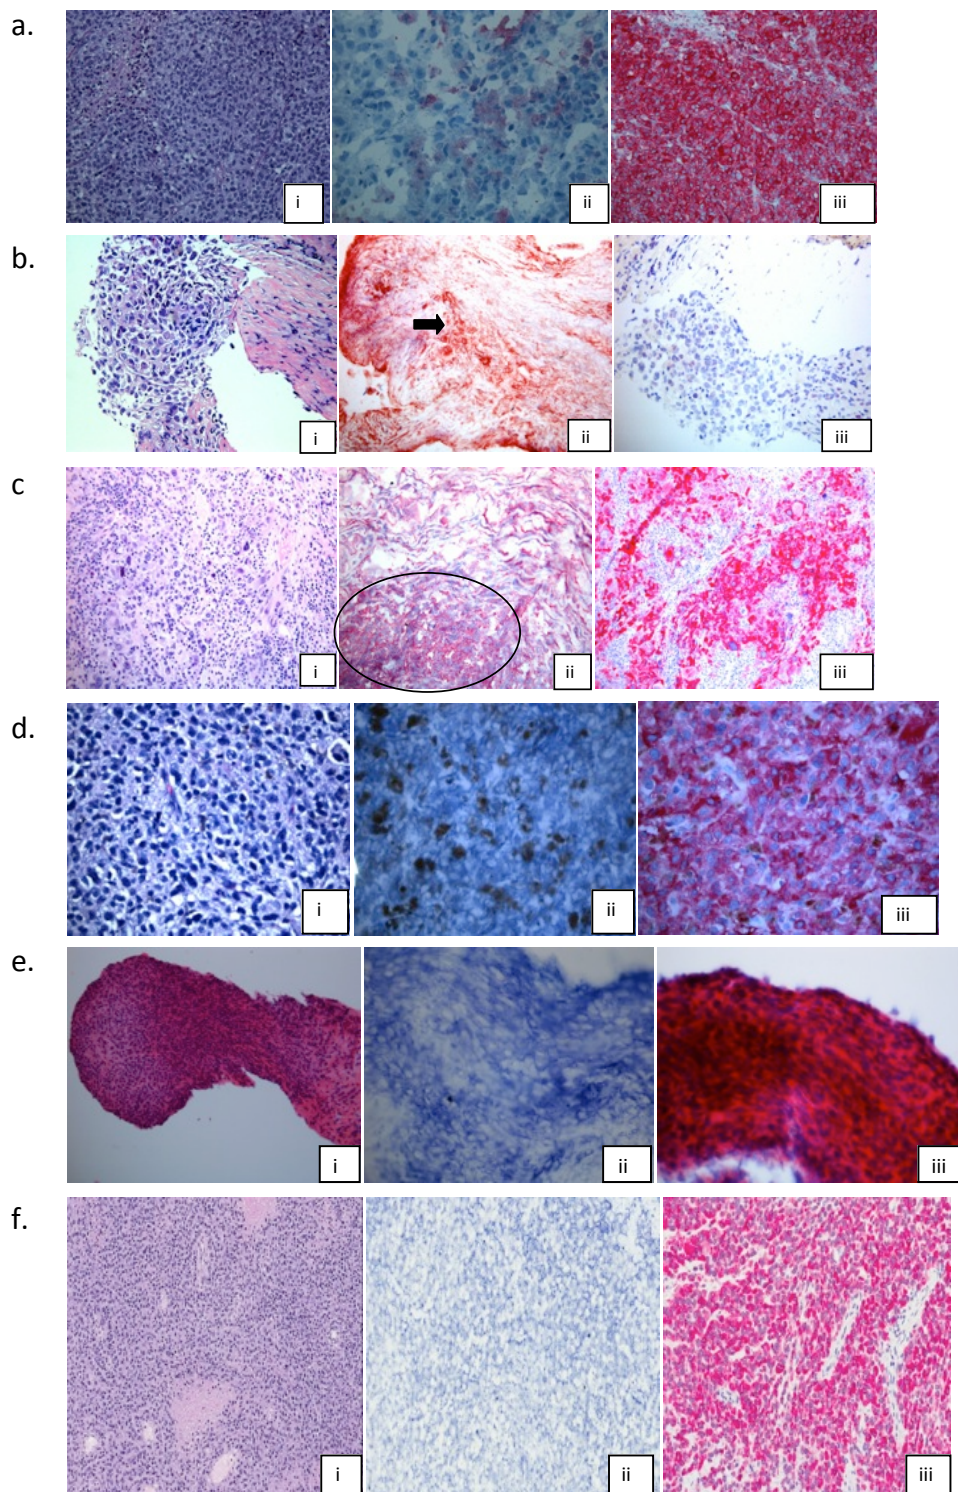

**Supplementary Figure 1: HLA-A2 and tyrosinase expression in patients. a.** Patient 1 mesenteric lymph node (i) H&E of melanoma replacing lymph node. 200x. (ii) HLA-A2 staining (red chromogen) highlights cytoplasm in 20% of tumor cells. 400x. (iii) Tyrosinase staining (red chromogen) highlights cytoplasm of nearly 100% of tumor cells. 200x. **b.** Excluded patient pleural biopsy (i) H&E melanoma cells. (ii) HLA-A2 (red chromogen) highlights melanoma cells (black arrow). (iii) Tyrosinase was negative in the melanoma cells. 200x. **c.** Patient 2 subcutaneous nodule biopsy. (i) H&E stained melanoma cells. (ii) HLA-A2 (red chromogen) highlights melanoma cells (circle). (iii) Tyrosinase highlights the melanoma cells (red chromogen). 200x. **d.** Excluded patient arm mass biopsy (i) H&E stained melanoma with pigment deposition. (ii) HLA-A2 (blue chromogen) highlights melanoma cells. (iii) Tyrosinase highlights the melanoma cells (red chromogen). 200x. **e.** Patient 3 adrenal biopsy (i) H&E stained melanoma with spindle cell features. 100x. (ii) HLA-A2 (blue chromogen) highlights melanoma cells. 200x. (iii) Tyrosinase highlights the melanoma cells (red chromogen). 200x. **f.** Excluded patient subcutaneous thigh nodule (i) H&E melanoma tumor cells in the subcutis. (ii) HLA A2 is positive in the tumor cells (blue chromogen). (iii) Tyrosinase immunohistochemical stain (red chromogen) highlights melanoma cells. 200x.

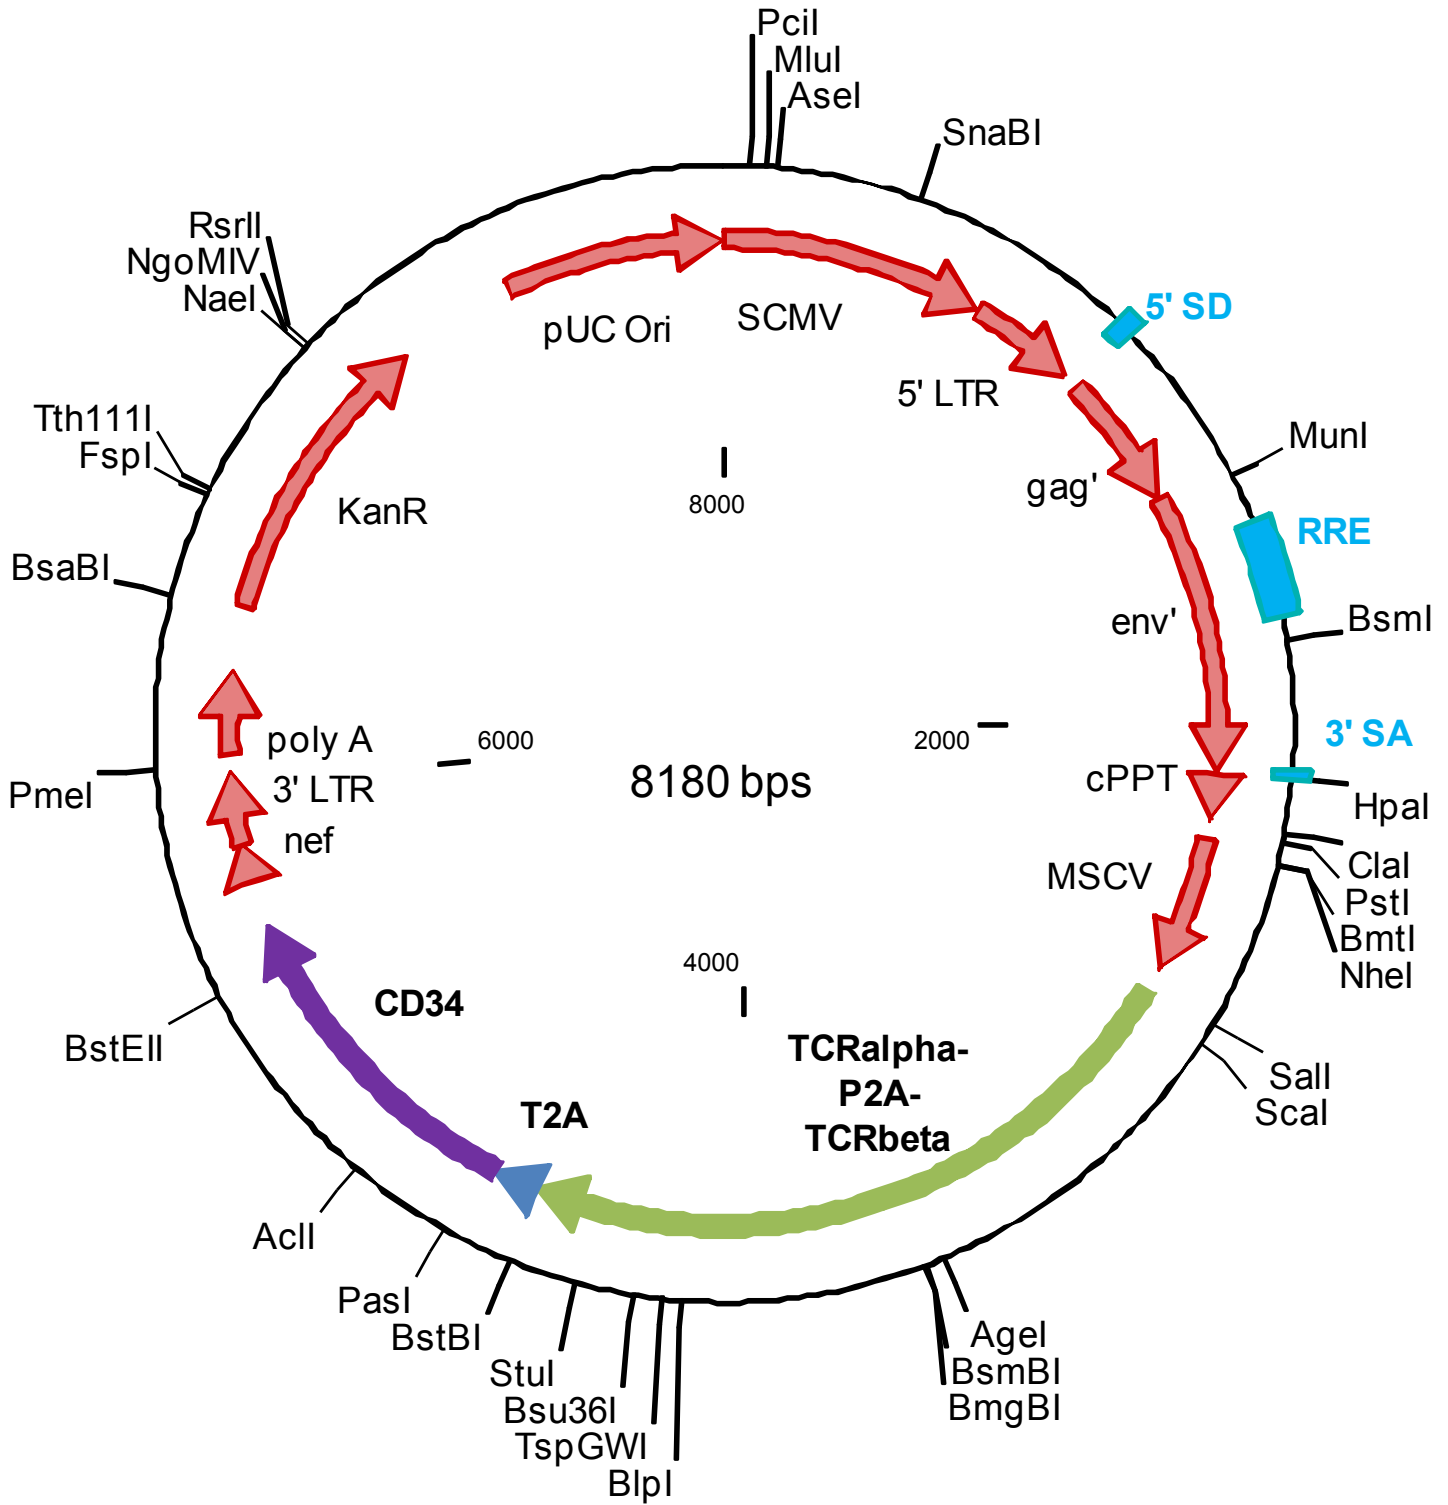

**Supplementary Figure 2:** Schematic of the lentiviral vector used to transduce patient T cells

The TCRalpha-P2A-TCRbeta region represents the TCR  $\alpha$  chain cloned from the tyrosinase-reactive CD8-independent TIL 1383I T cell clone followed by a P2A ribosomal skipping site then the TCR  $\beta$  chain cloned from the TIL 1383I T cell clone.

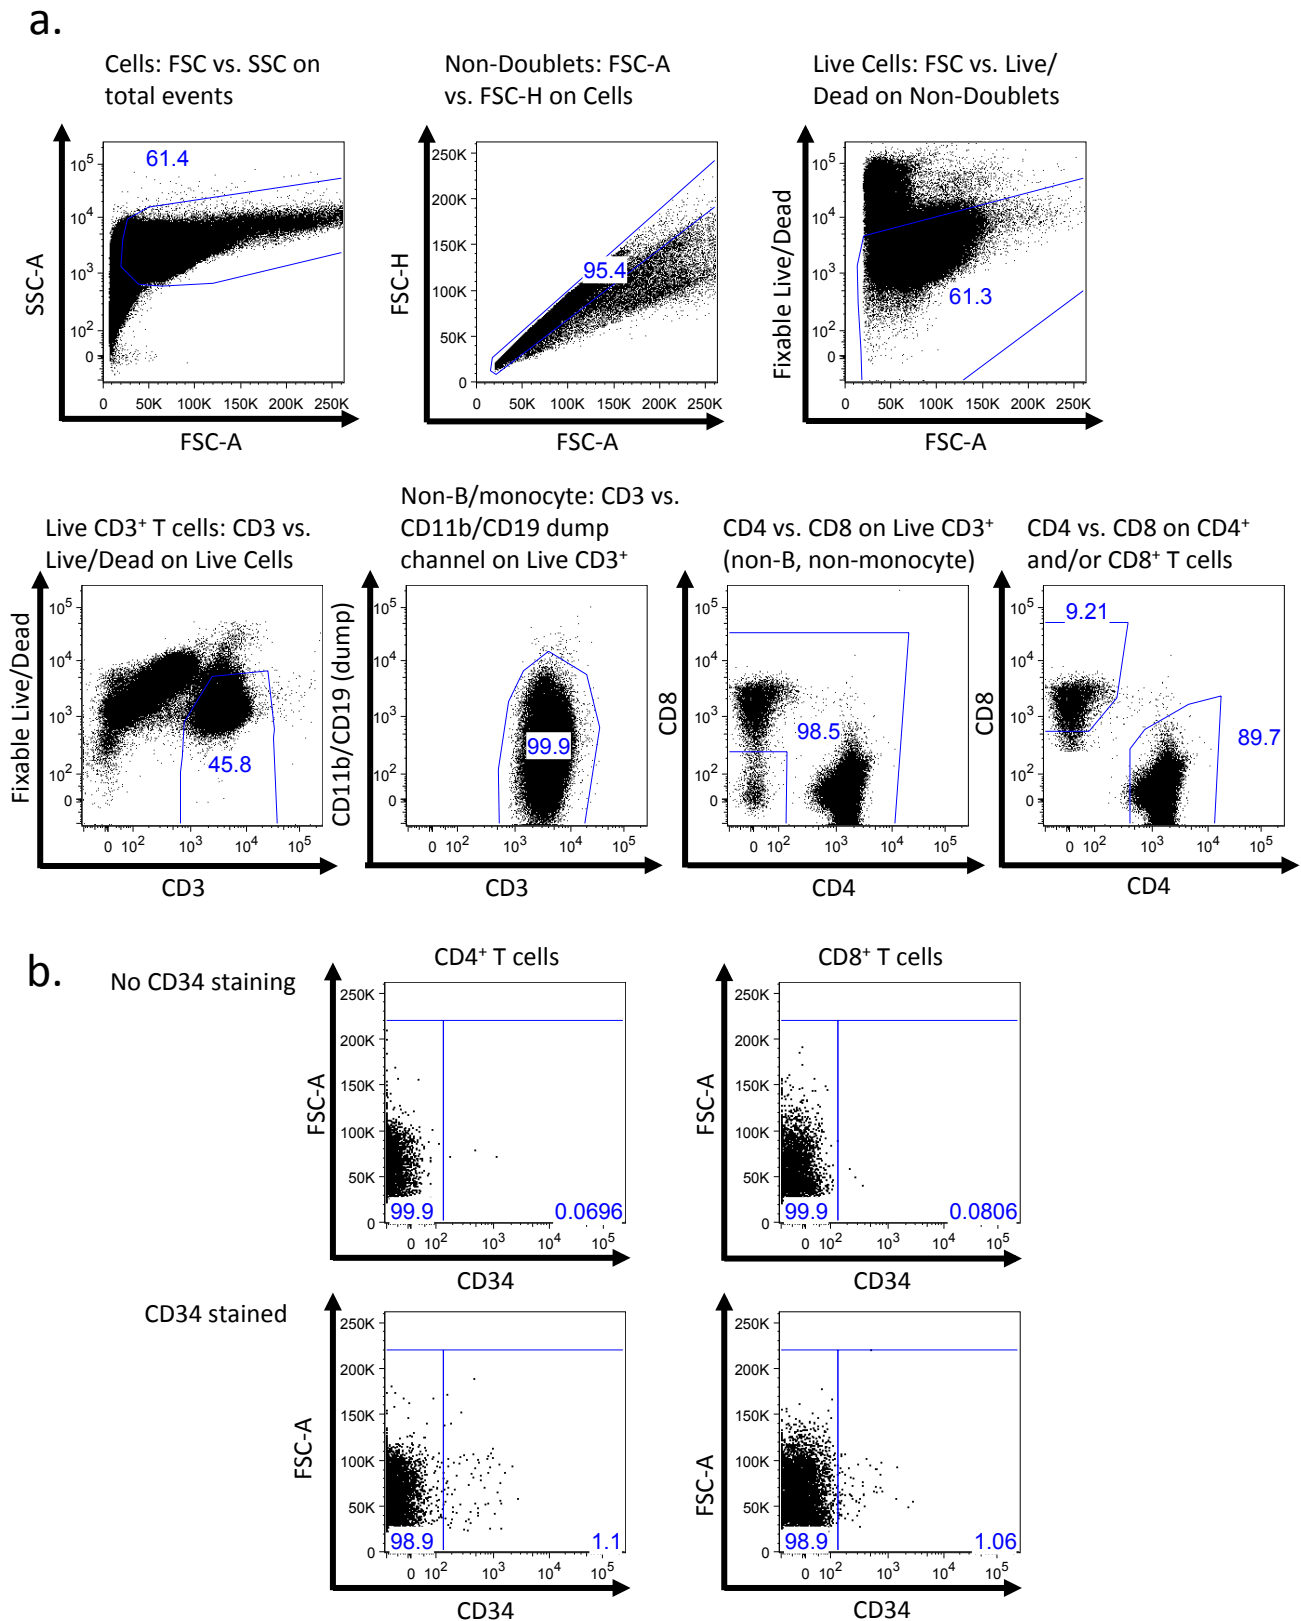

**Supplementary Figure 3: Gating strategy to identify and characterize transduced T cells.**  
**a.** Identification of live CD4<sup>+</sup> and CD8<sup>+</sup> T cells. **b.** Identification of CD34<sup>+</sup> T cells in the CD4<sup>+</sup> and CD8<sup>+</sup> T cells. **c-e.** Representative gating for activated (CD25<sup>+</sup>CD69<sup>+</sup>), exhausted/inhibited (PD-1<sup>+</sup>TIM-3<sup>+</sup>), and other (CTLA-4<sup>+</sup>, OX40<sup>+</sup>, and CCR7<sup>+</sup>) markers shown from Patient 3 day 14 sample blood. **c.** Representative gating on Patient 3 day 14 sample blood cells not stained for phenotype markers (negative control). **d.** Sample gating on fully stained Patient 3 day 14 blood sample. **e.** Sample gating on fully stained Patient 3 Final Product prior to transfer into the patient



C.

CD25 vs. CD69

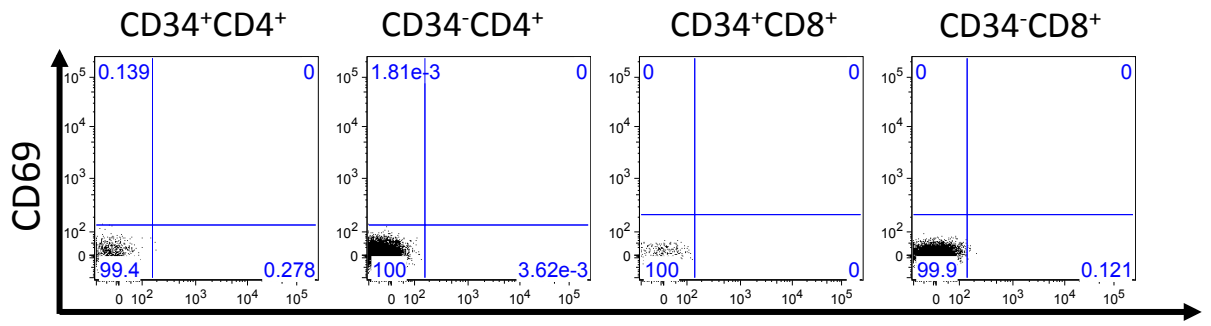

PD-1 vs. TIM-3

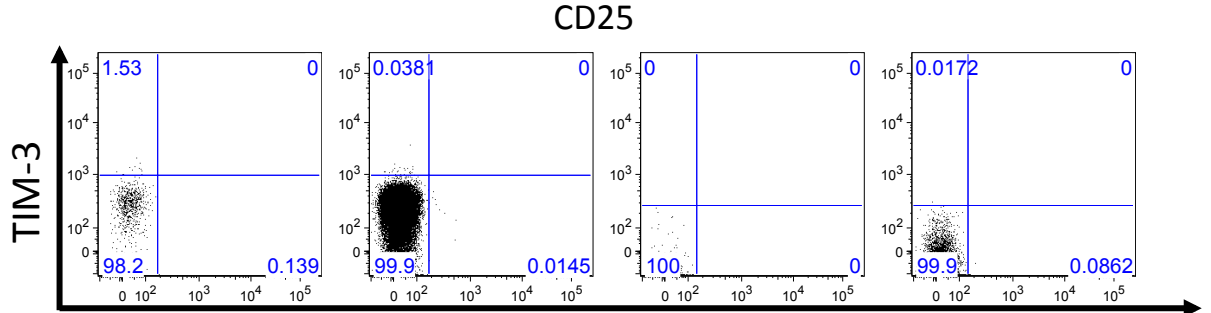

CTLA-4

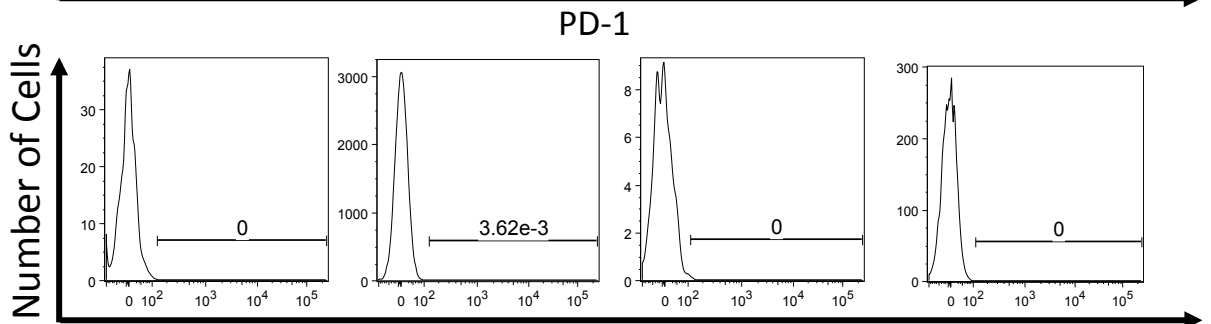

OX40

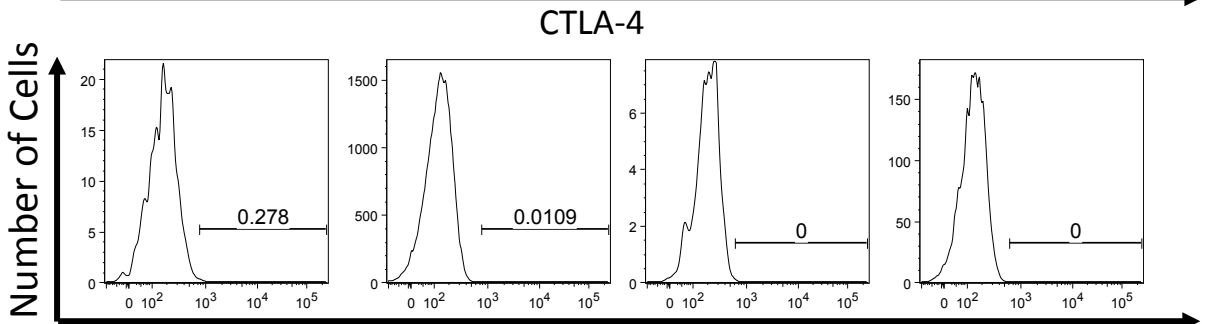

CCR7

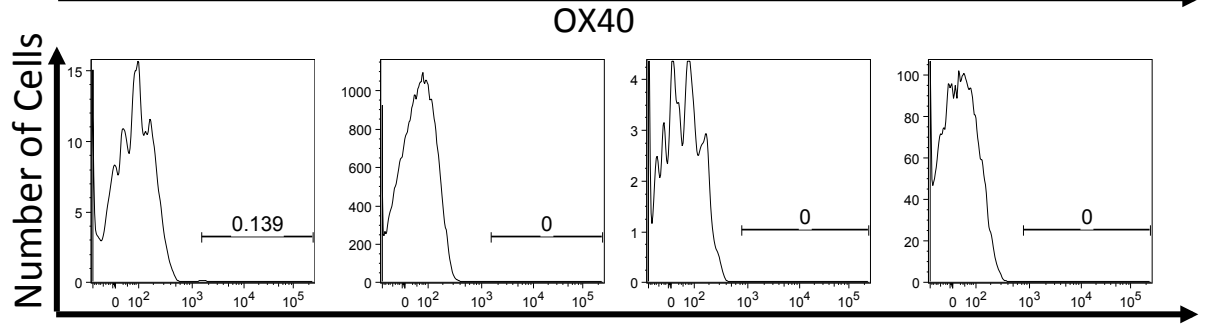

d.

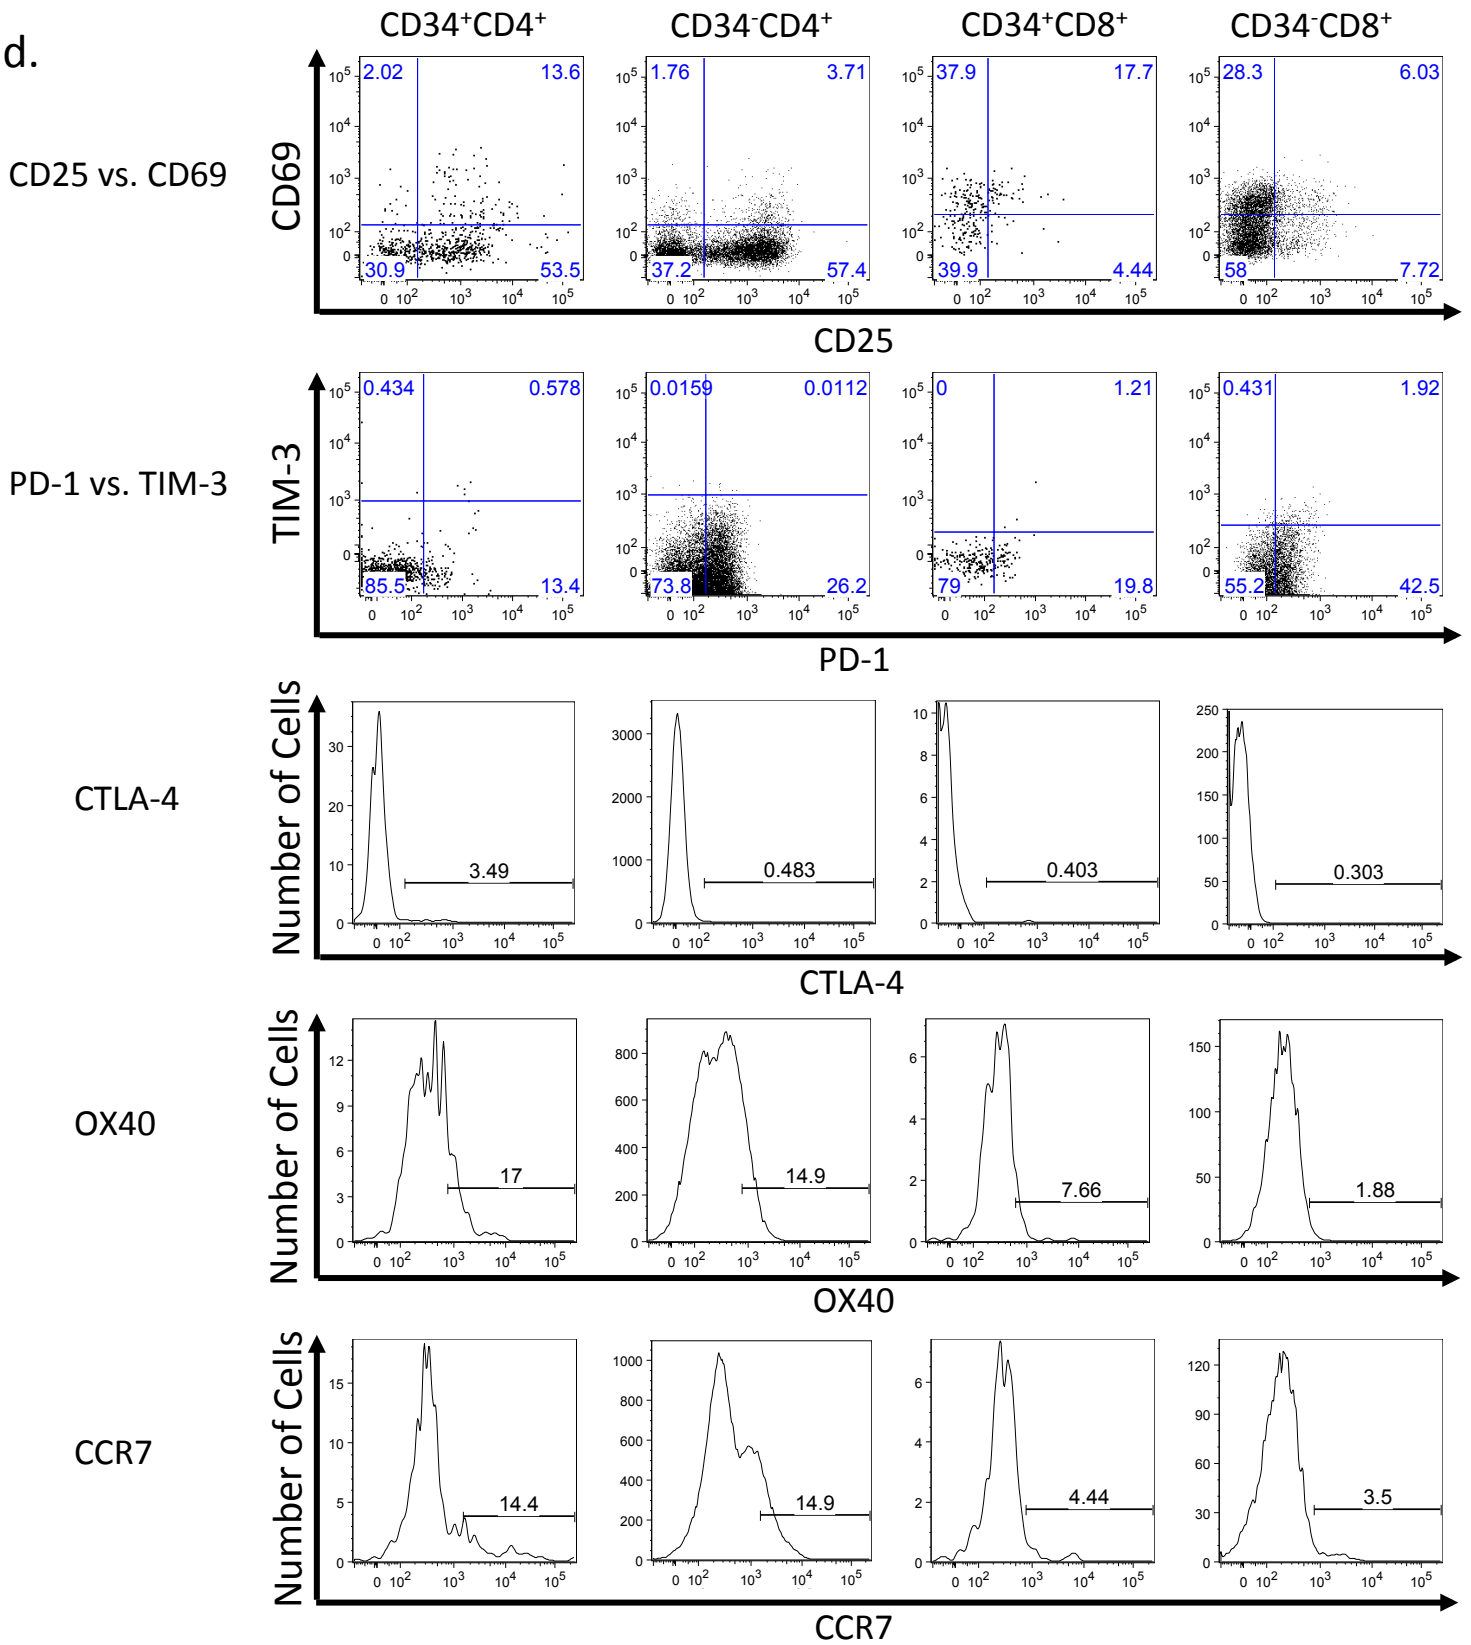



e.

CD25 vs. CD69

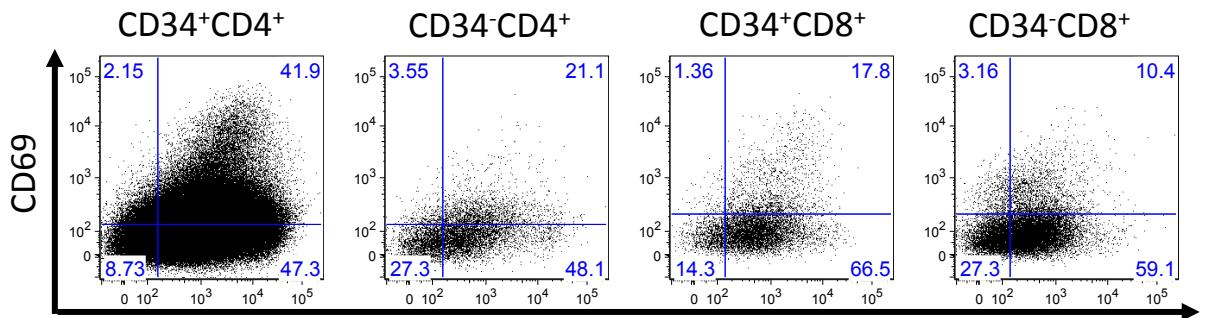

PD-1 vs. TIM-3

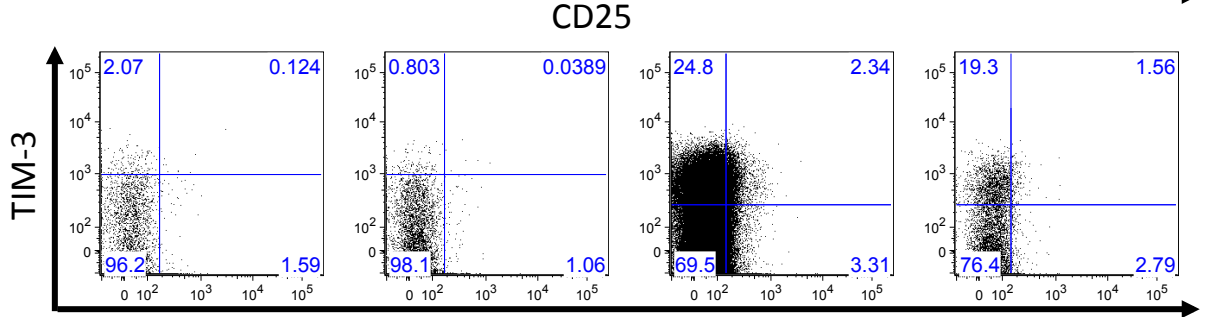

CTLA-4

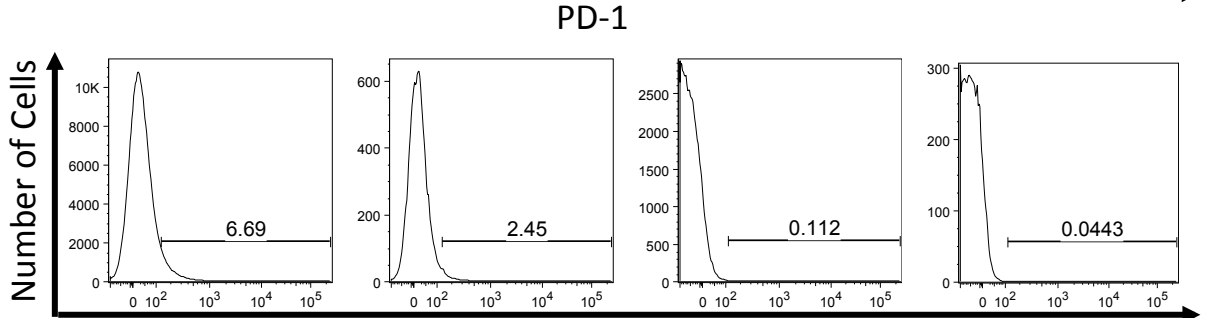

OX40

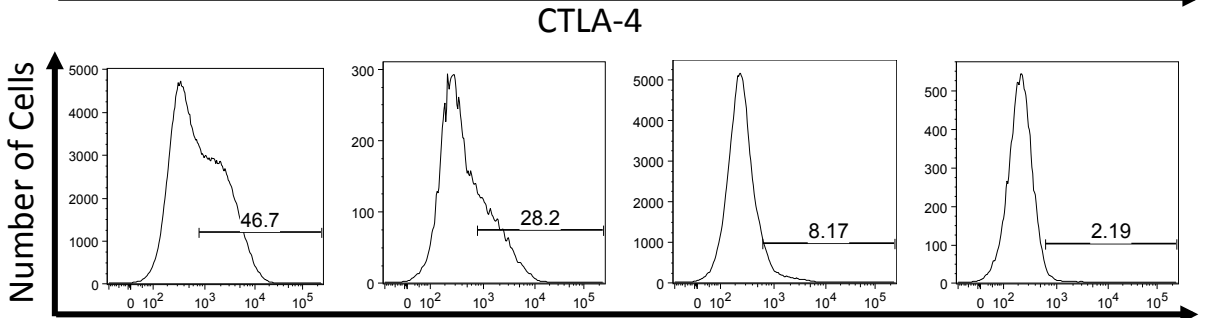

CCR7

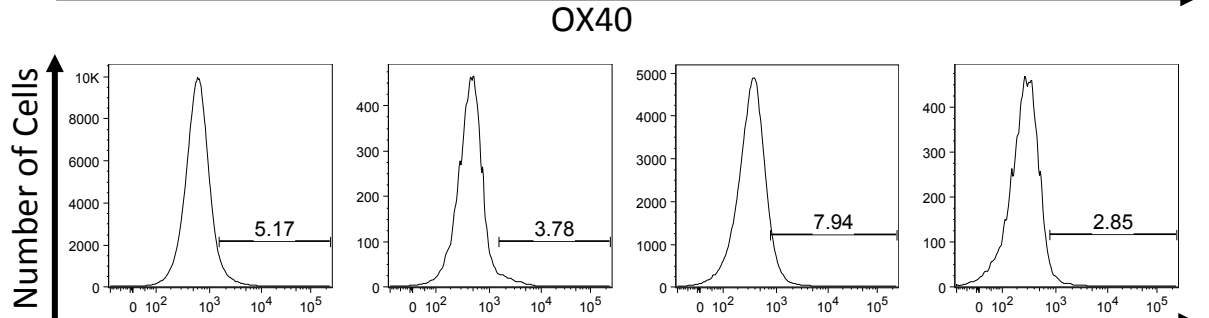

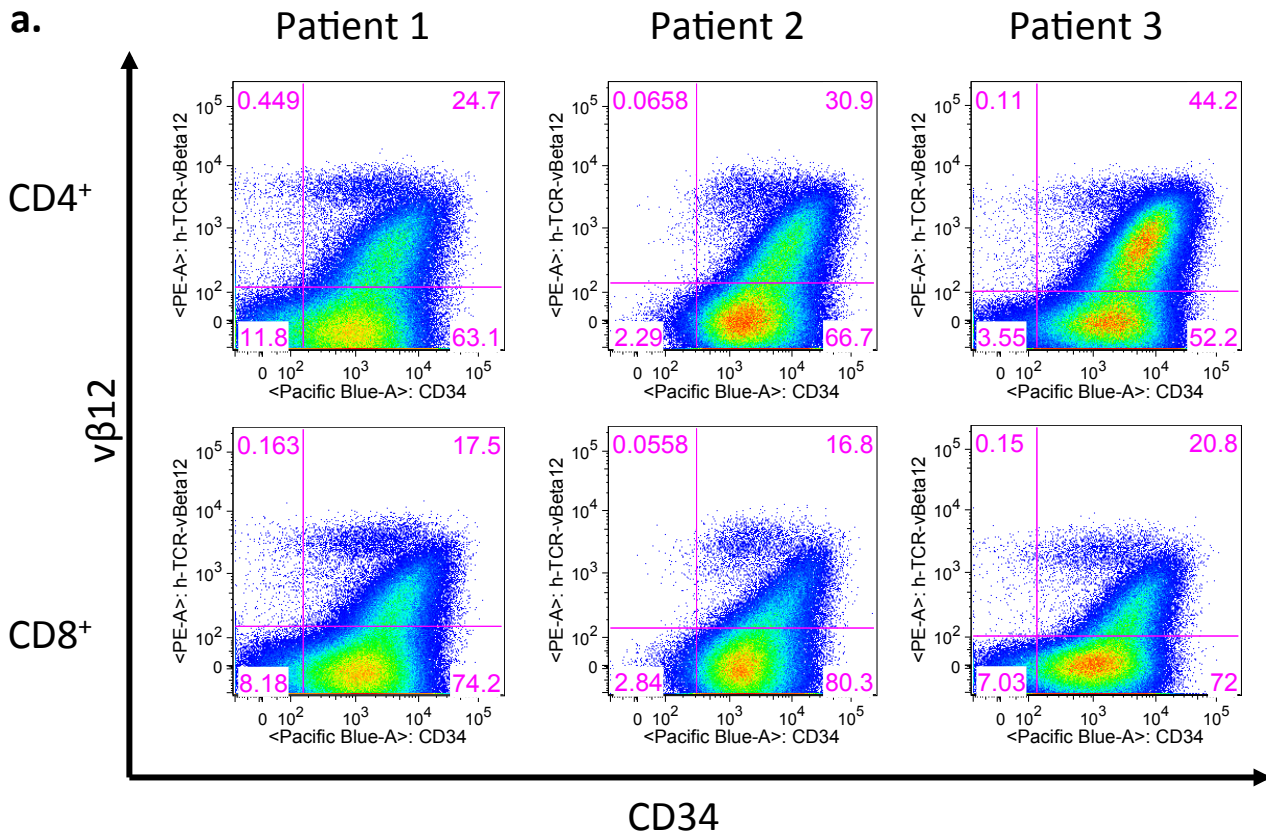

**b.**

| Patient | MFI of CD34 on CD4 <sup>+</sup> T cells | MFI of CD34 on CD34 <sup>+</sup> CD4 <sup>+</sup> T cells | MFI of vβ12 on CD4 <sup>+</sup> T cells | MFI of vβ12 on CD34 <sup>+</sup> CD4 <sup>+</sup> T cells | MFI of CD34 on CD8 <sup>+</sup> T cells | MFI of CD34 on CD34 <sup>+</sup> CD8 <sup>+</sup> T cells | MFI of vβ12 on CD8 <sup>+</sup> T cells | MFI of vβ12 on CD34 <sup>+</sup> CD8 <sup>+</sup> T cells |
|---------|-----------------------------------------|-----------------------------------------------------------|-----------------------------------------|-----------------------------------------------------------|-----------------------------------------|-----------------------------------------------------------|-----------------------------------------|-----------------------------------------------------------|
| 1       | 2661                                    | 3025                                                      | 186                                     | 208                                                       | 3163                                    | 3445                                                      | 112                                     | 122                                                       |
| 2       | 6808                                    | 6967                                                      | 268                                     | 274                                                       | 4267                                    | 4408                                                      | 104                                     | 107                                                       |
| 3       | 5721                                    | 5937                                                      | 317                                     | 329                                                       | 2703                                    | 2909                                                      | 89.6                                    | 96                                                        |

**Supplementary Figure 4 : CD34 and vβ12 expression on patient final products**

Frozen samples of final preparations of T cells were thawed and analyzed with each patients blood sample cohort. **a.** CD34 and vβ12 expression on CD4<sup>+</sup> and CD8<sup>+</sup> CD3<sup>+</sup> T cells were analyzed by flow cytometry. **b.** Mean fluorescence intensities of CD34 and vβ12 were calculated on both total CD4<sup>+</sup> and CD8<sup>+</sup> CD3<sup>+</sup> T cells and CD34<sup>+</sup> CD4<sup>+</sup> and CD8<sup>+</sup> CD3<sup>+</sup> T cells.

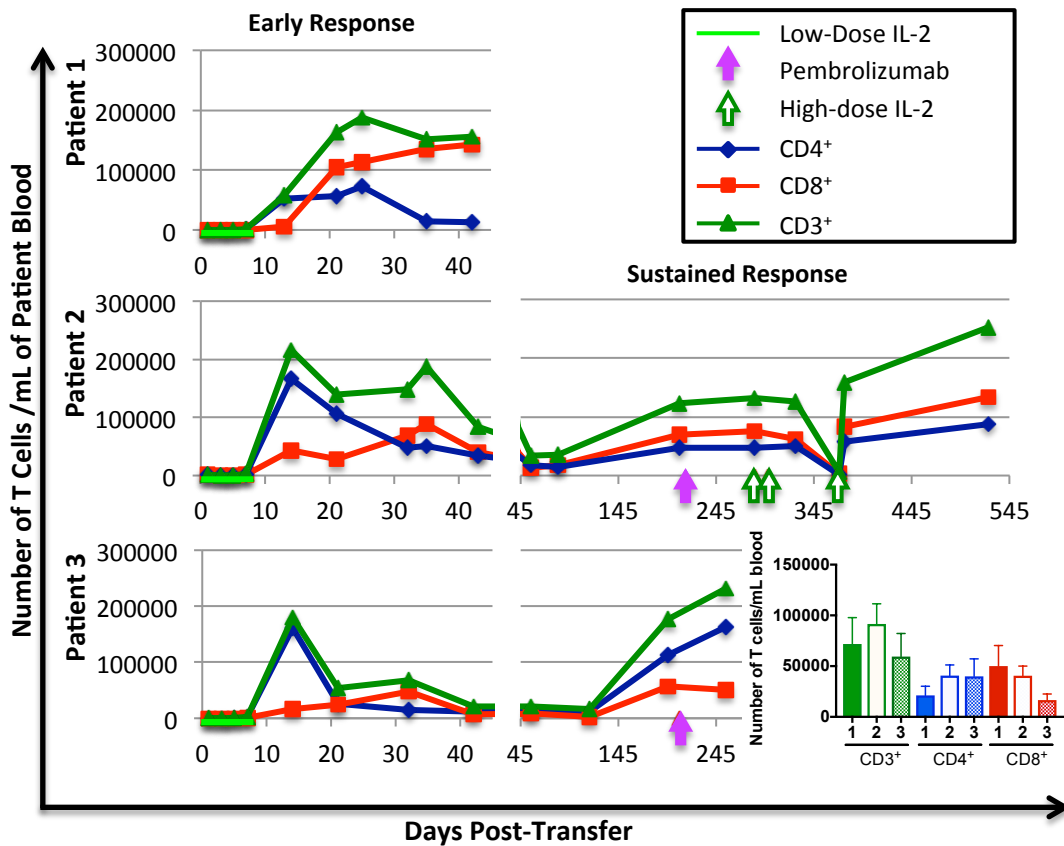

**Supplementary Figure 5:** Number of T cells per mL in patient blood samples. Patient blood samples were collected and PBMCs isolated as described in Fig. 2. Patients were treated with low-dose IL-2 (72,000IU/kg, IV, three times daily) for seven days after T cell infusion (green line). Two patients went on to receive pembrolizumab, each course (2mg/kg, given i.v. every 3 weeks) indicated by closed purple arrows, and one patient further received high-dose IL-2, with each course (600,000 IU/m<sup>2</sup>, given i.v. every 8 hours for a maximum of 14 doses on days 284, 298, and 368 post-T cell infusion) indicated by open green arrows. The number of total (green triangles), CD4<sup>+</sup> (blue diamonds), and CD8<sup>+</sup> (red squares) CD3<sup>+</sup> T cells per mL of patient blood are shown.

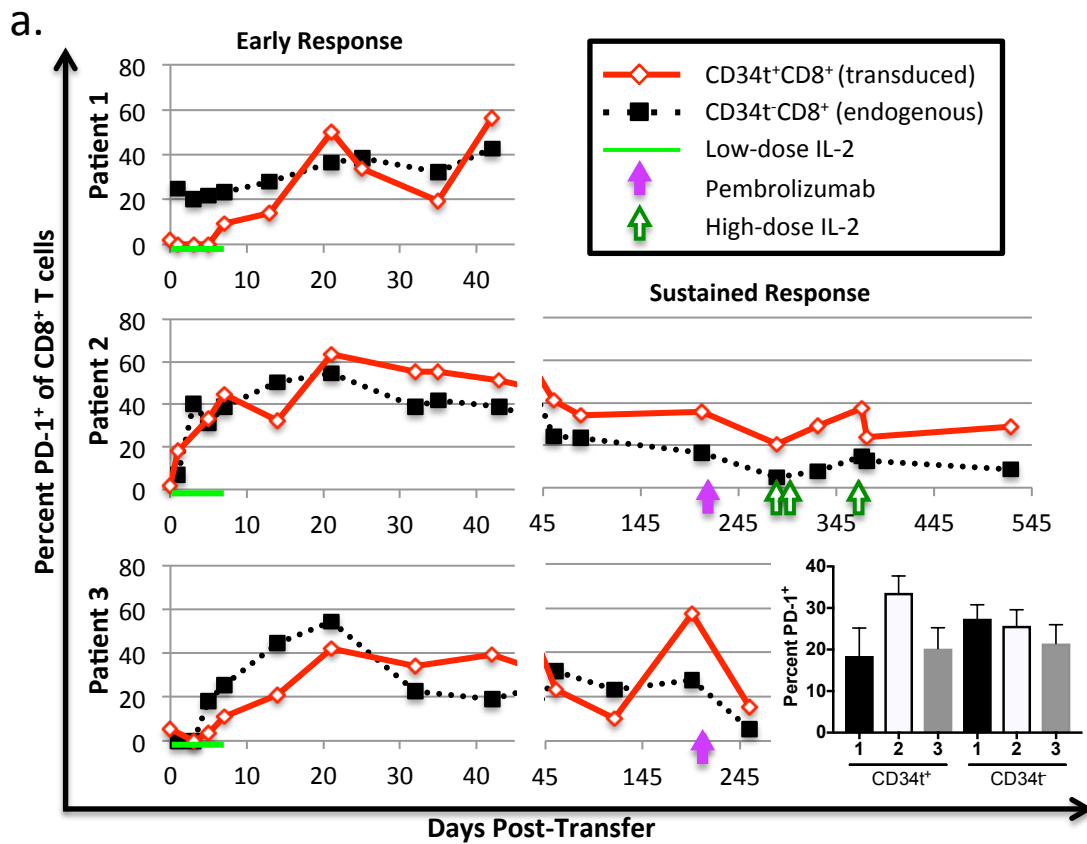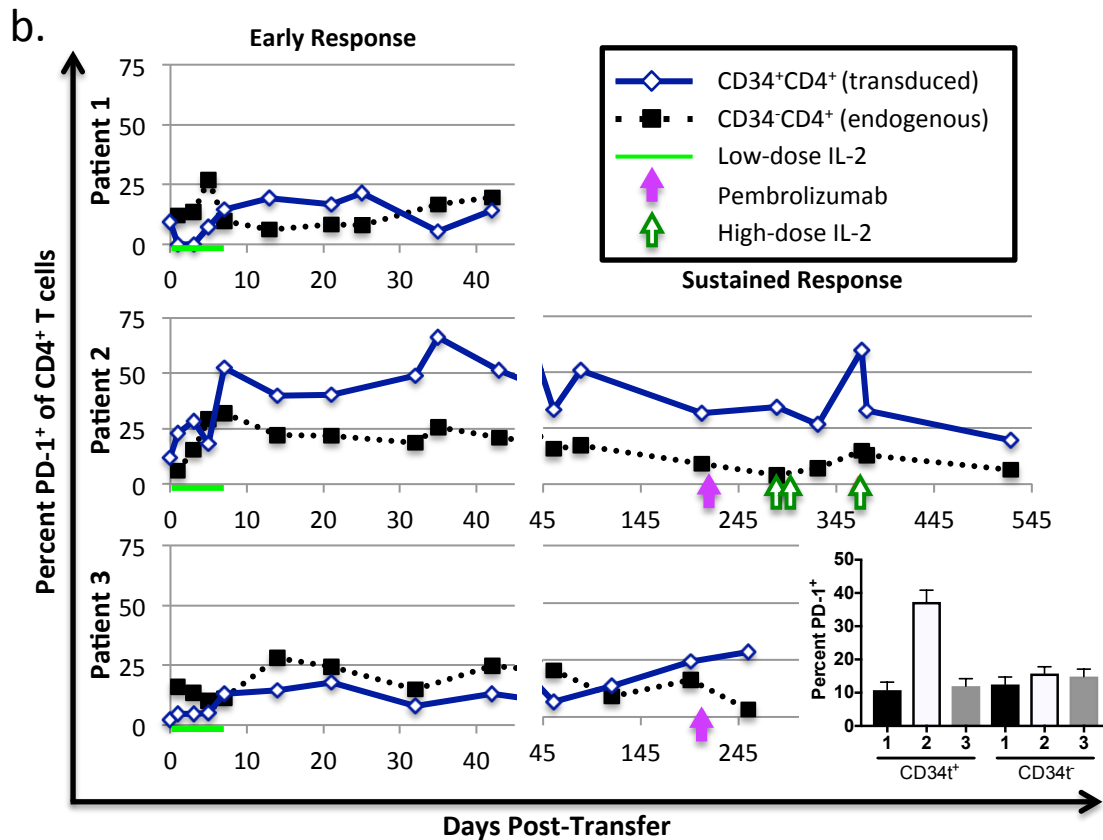

**Supplementary Figure 6:** PD-1 expression on transduced and endogenous T cells. Patient blood samples were collected and PBMCs isolated as described in Fig. 2. **a.** The percent of transduced (CD34<sup>+</sup>, red open diamonds) and endogenous (CD34<sup>-</sup>, black squares, dotted line) CD8<sup>+</sup> T cells expressing PD-1 are shown. **b.** The percent of transduced (CD34<sup>+</sup>, blue open diamonds) and endogenous (CD34<sup>-</sup>, black squares, dotted line) CD4<sup>+</sup> T cells expressing PD-1 are shown.

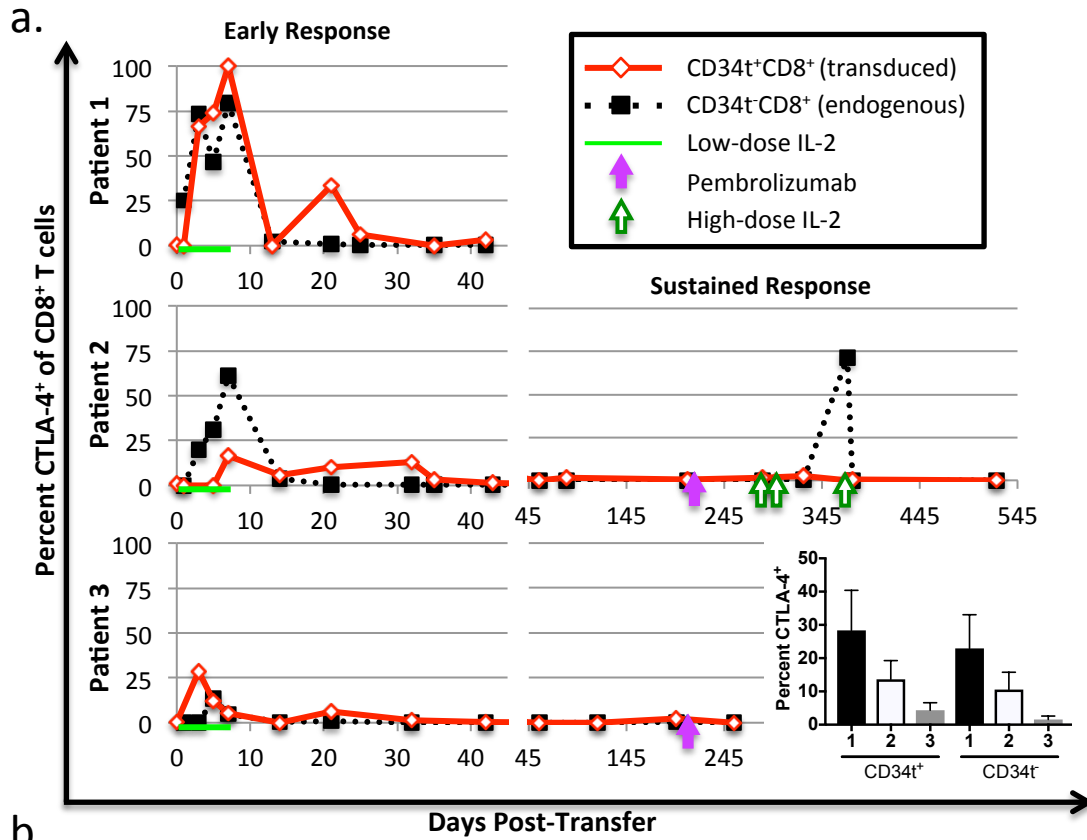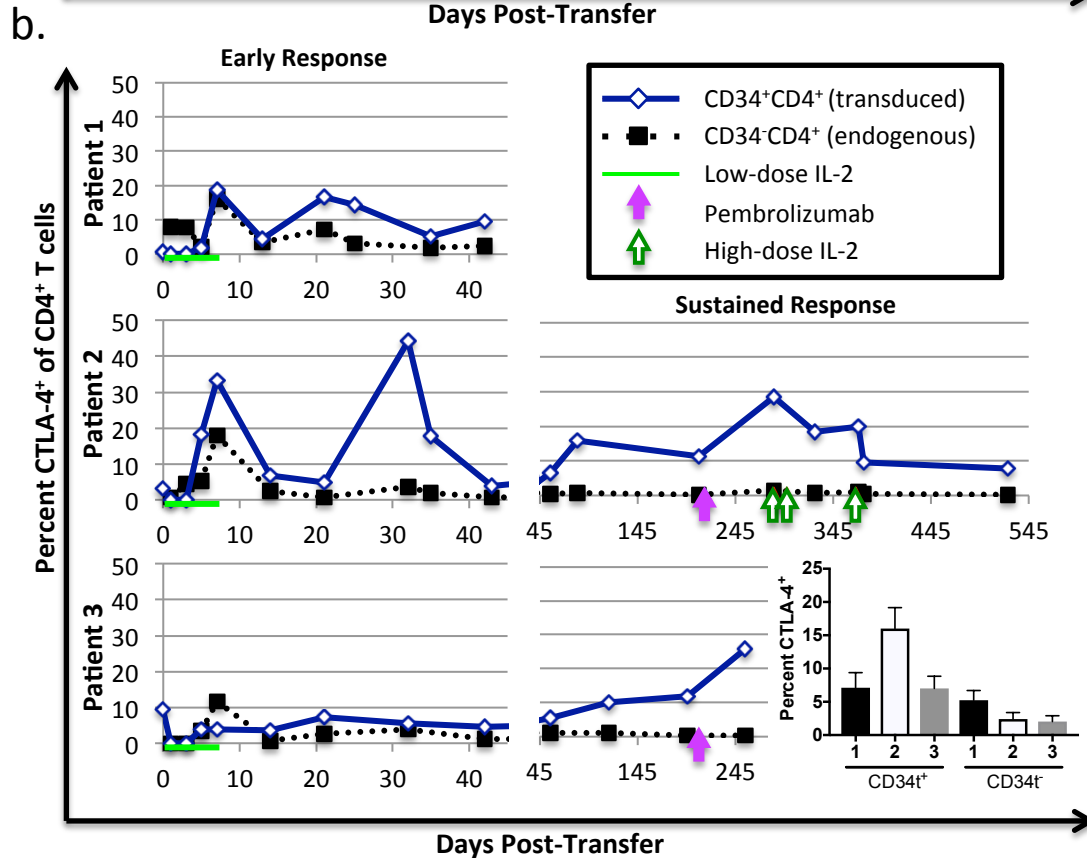

**Supplementary Figure 7: CTLA-4 expression on transduced and endogenous T cells.** Patient blood samples were collected and PBMCs isolated as described in Fig. 2. **a.** The percent of transduced (CD34<sup>+</sup>, red open diamonds) and endogenous (CD34<sup>-</sup>, black squares, dotted line) CD8<sup>+</sup> T cells expressing CTLA-4 are shown. **b.** The percent of transduced (CD34<sup>+</sup>, blue open diamonds) and endogenous (CD34<sup>-</sup>, black squares, dotted line) CD4<sup>+</sup> T cells expressing CTLA-4 are shown.

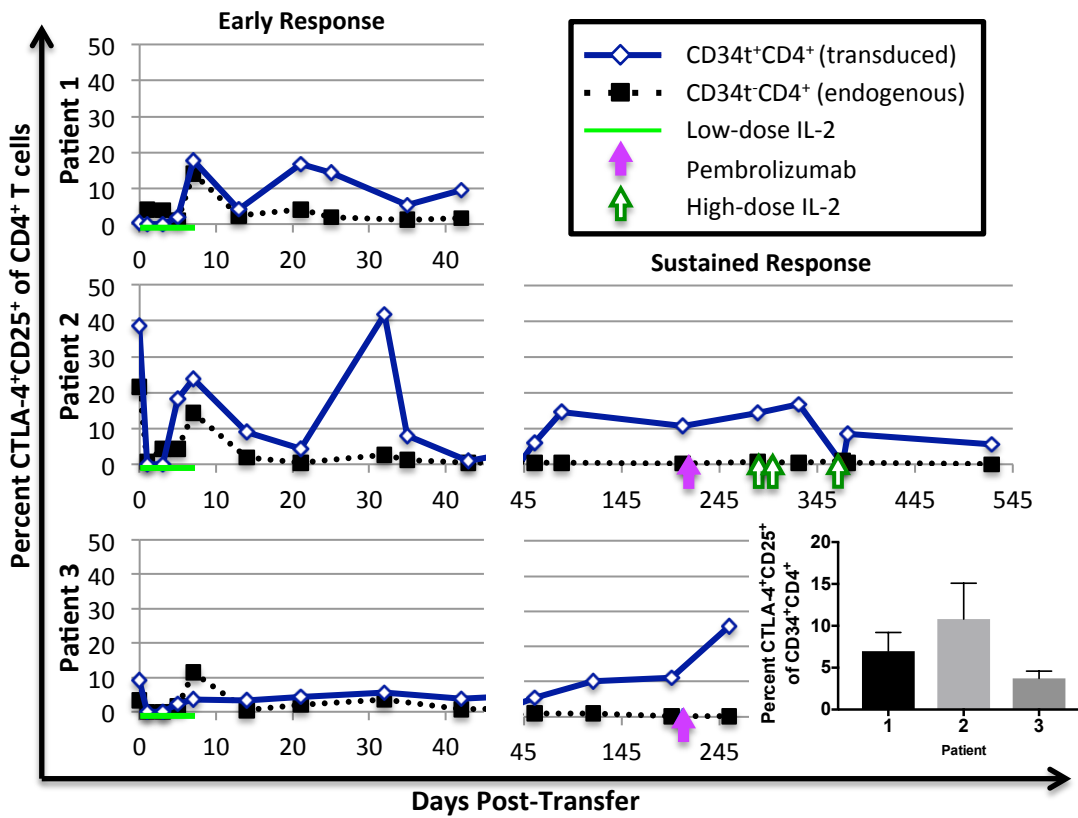

**Supplementary Figure 8:** CTLA-4 and CD25 co-expression on transduced and endogenous CD4<sup>+</sup> T cells.

Patient blood samples were collected and PBMCs isolated as described in Fig. 2. Shown are the percent of transduced (CD34t<sup>+</sup>, blue open diamonds) and endogenous (CD34t<sup>-</sup>, black squares, dotted line) CD4<sup>+</sup> T cells co-expressing CD25 and CTLA-4.

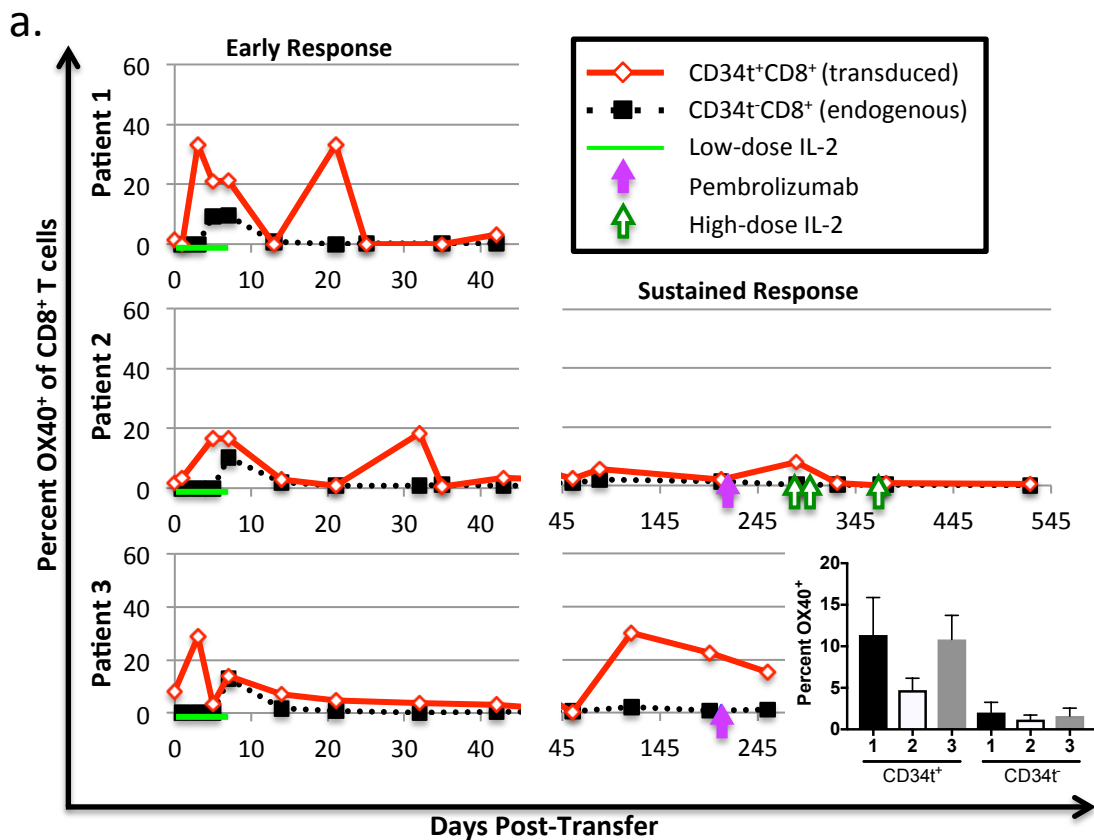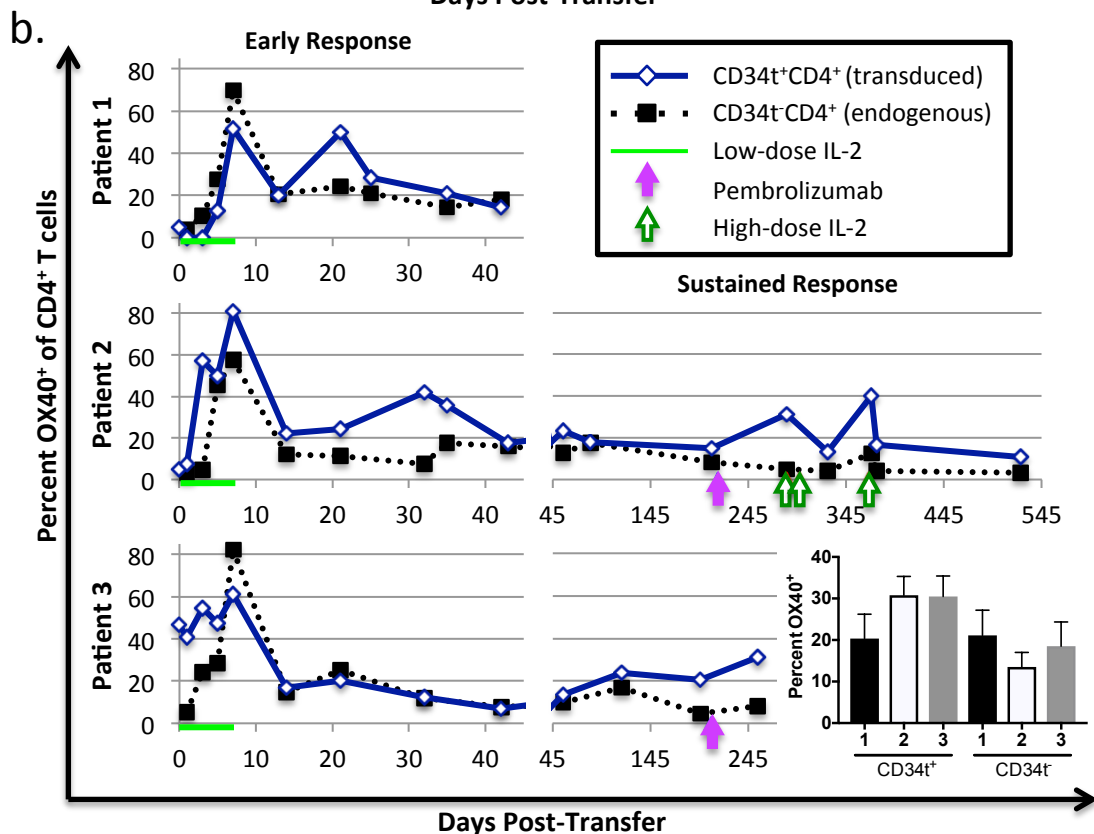

**Supplementary Figure 9: OX40 expression on transduced and endogenous T cells.** Patient blood samples were collected and PBMCs isolated as described in Fig. 2. **a.** The percent of transduced (CD34<sup>+</sup>, red open diamonds) and endogenous (CD34<sup>-</sup>, black squares, dotted line) CD8<sup>+</sup> T cells expressing OX40 are shown. **b.** The percent of transduced (CD34<sup>+</sup>, blue open diamonds) and endogenous (CD34<sup>-</sup>, black squares, dotted line) CD4<sup>+</sup> T cells expressing OX40 are shown.



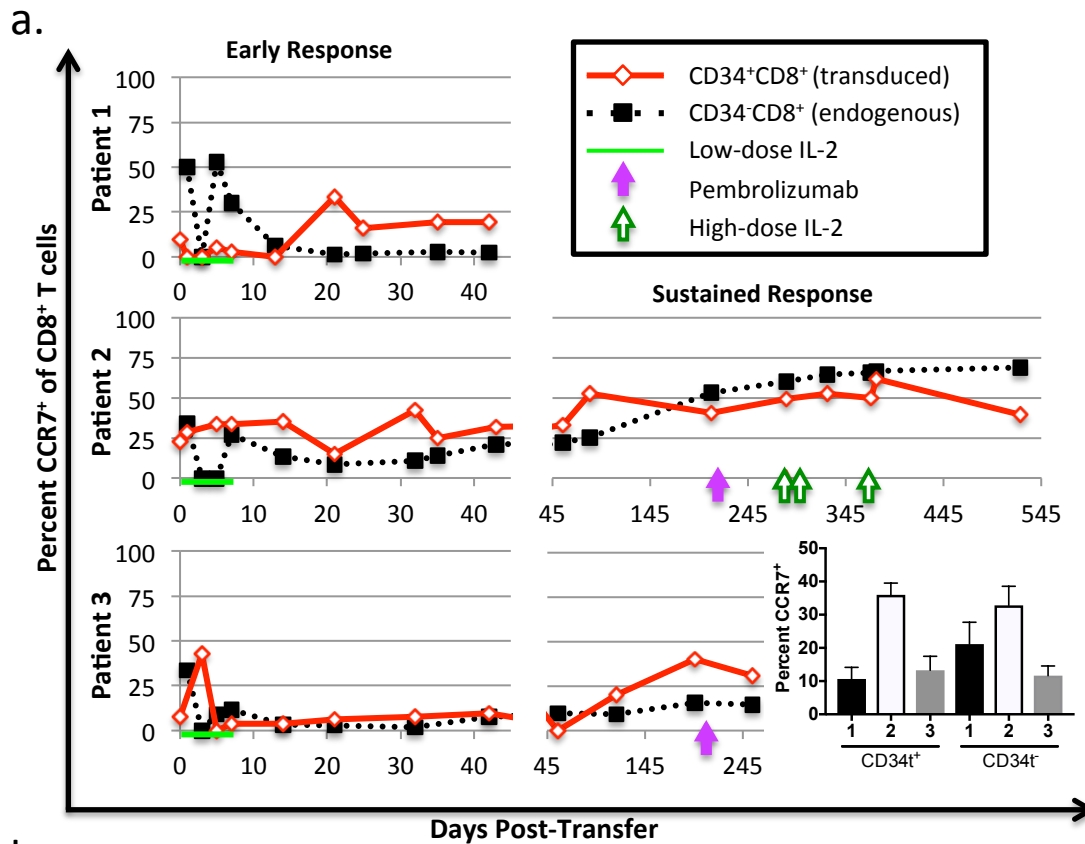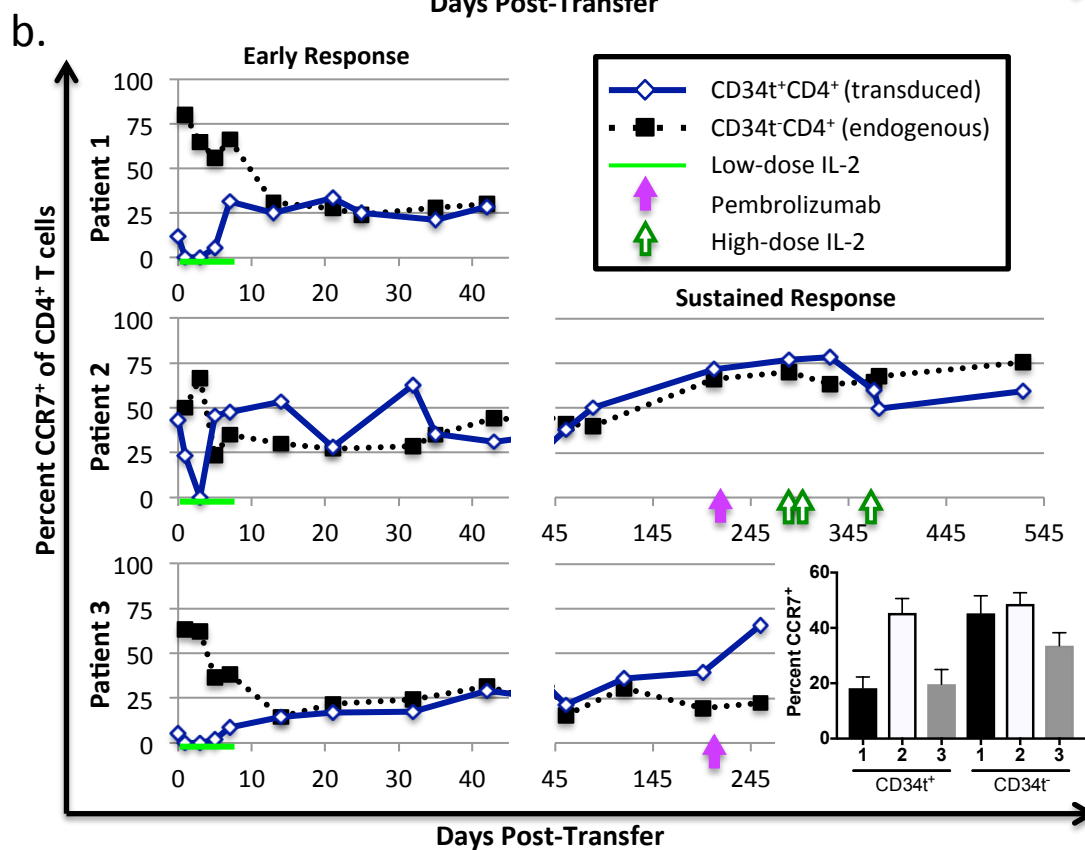

**Supplementary Figure 10: CCR7 expression on transduced and endogenous T cells.** Patient blood samples were collected and PBMCs isolated as described in Fig. 2. **a.** The percent of transduced (CD34<sup>+</sup>, red open diamonds) and endogenous (CD34<sup>-</sup>, black squares, dotted line) CD8<sup>+</sup> T cells expressing CCR7 are shown. **b.** The percent of transduced (CD34<sup>+</sup>, blue open diamonds) and endogenous (CD34<sup>-</sup>, black squares, dotted line) CD4<sup>+</sup> T cells expressing CCR7 are shown.
